# Supplementary material for: 794 nm excited core–shell upconversion nanoparticles for optical temperature sensing
Source: Royal Society of Chemistry journal article supplement (doi:10.1039/c5ra27203c), 2016-01-01
Supplement: c5ra27203c1.pdf [file c5ra27203c1.pdf]

Electronic Supplementary Material (ESI) for RSC Advances.  
This journal is © The Royal Society of Chemistry 2016

## **Electronic Supplementary Information**

# **794 nm excited core-shell upconversion nanoparticles for optical temperature sensing**

**Guicheng Jiang,<sup>a</sup> Shaoshuai Zhou,<sup>b,c</sup> Xiantao Wei,<sup>b</sup> Yonghu Chen,<sup>b</sup> Changkui**

**Duan,<sup>b</sup> Min Yin,<sup>\*b</sup> Bin Yang<sup>\*a</sup> and Wenwu Cao<sup>a,d</sup>**

<sup>a</sup> Condensed Matter Science and Technology Institute, Harbin Institute of Technology,  
Harbin 150001, China. E-mail address: binyang@hit.edu.cn

<sup>b</sup> Department of Physics, University of Science and Technology of China, Hefei 230026,  
China. E-mail address: yinmin@ustc.edu.cn

<sup>c</sup> Department of Physics, Qufu Normal University, Qufu, Shandong 273165, China.

<sup>d</sup> Department of Mathematics and Materials Research Institute, The Pennsylvania State  
University, Pennsylvania 16802, USA

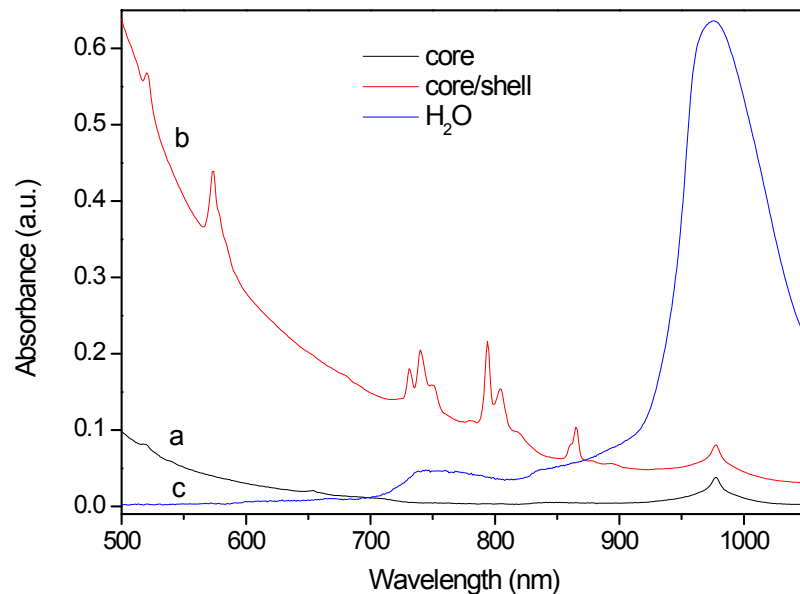

**Fig. S1** Absorption spectra of (a) core NaYF<sub>4</sub>:Yb<sup>3+</sup>/Er<sup>3+</sup> UNCPS dispersed in cyclohexane, (b) core/shell NaYF<sub>4</sub>:Yb<sup>3+</sup>/Er<sup>3+</sup>@NaYF<sub>4</sub>:Yb<sup>3+</sup>/Nd<sup>3+</sup> UNCPS dispersed in cyclohexane, and (c) H<sub>2</sub>O.

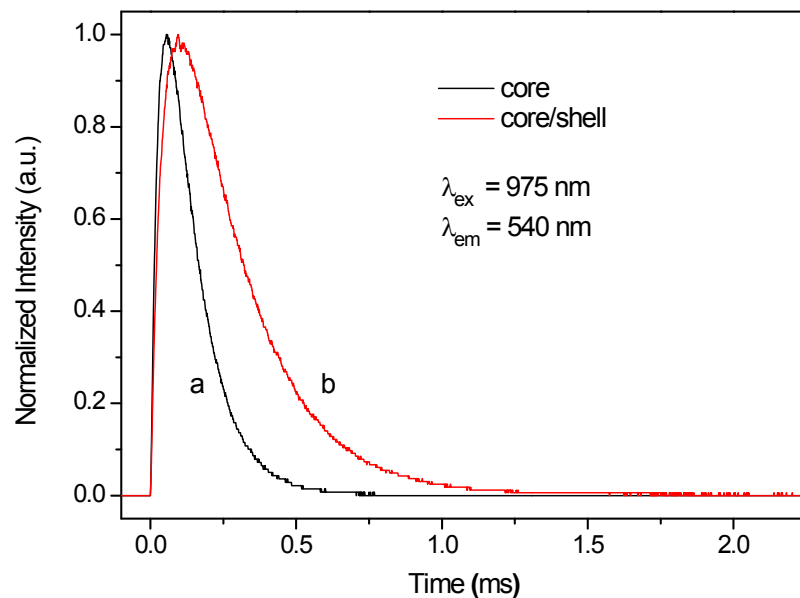

**Fig. S2** Decay curves of (a) core NaYF<sub>4</sub>:Yb<sup>3+</sup>/Er<sup>3+</sup> UNCPS, (b) core/shell NaYF<sub>4</sub>:Yb<sup>3+</sup>/Er<sup>3+</sup>@NaYF<sub>4</sub>:Yb<sup>3+</sup>/Nd<sup>3+</sup> UNCPS dispersed in cyclohexane.

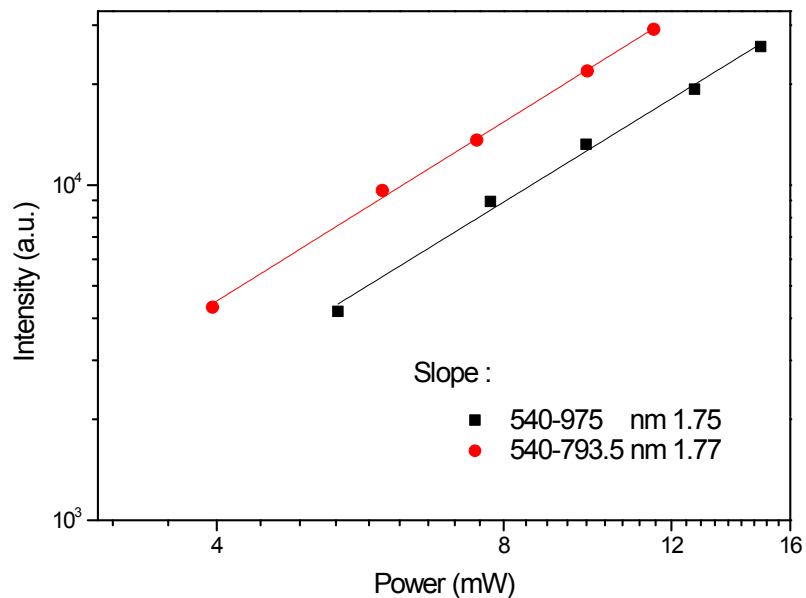

**Fig. S3** Power dependence curves of core/shell  $\text{NaYF}_4:\text{Yb}^{3+}/\text{Er}^{3+}@\text{NaYF}_4:\text{Yb}^{3+}/\text{Nd}^{3+}$  UCNPs for 540 nm emission under (a) 975 nm, and (b) 793.5 nm excitation.

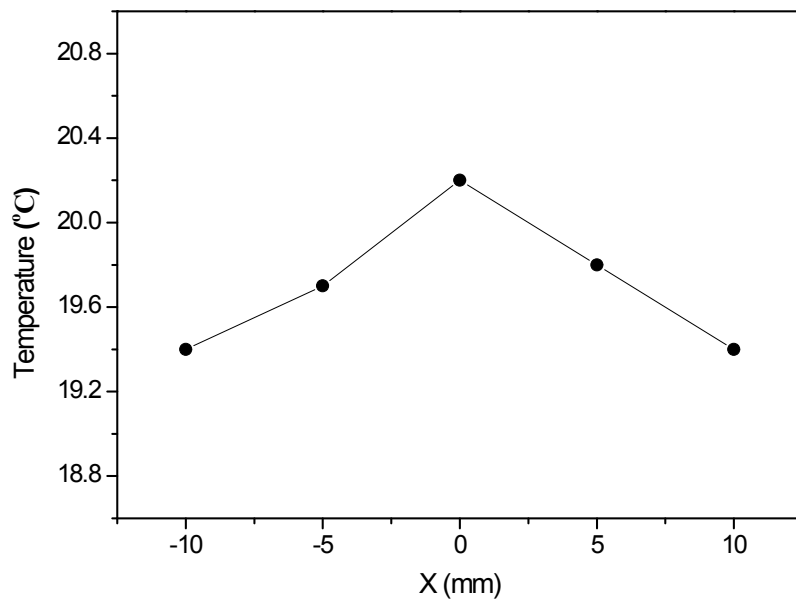

**Fig. S4** Temperature of a glass plate heated by 808 nm laser ( $0.2 \text{ W/cm}^2$ ). The room temperature is about  $19.4 \text{ }^\circ\text{C}$ .
